# Supplementary material
Source: Research Square preprint supplement (doi:10.21203/rs.3.rs-8830516/v1)
Supplement: Supplementary file 1 [file 0060dae0accee0400128f7a7.docx]

**Therapeutic exploitation of metabolic dysfunction in IDH wild-type glioblastoma**

**Supplementary material**


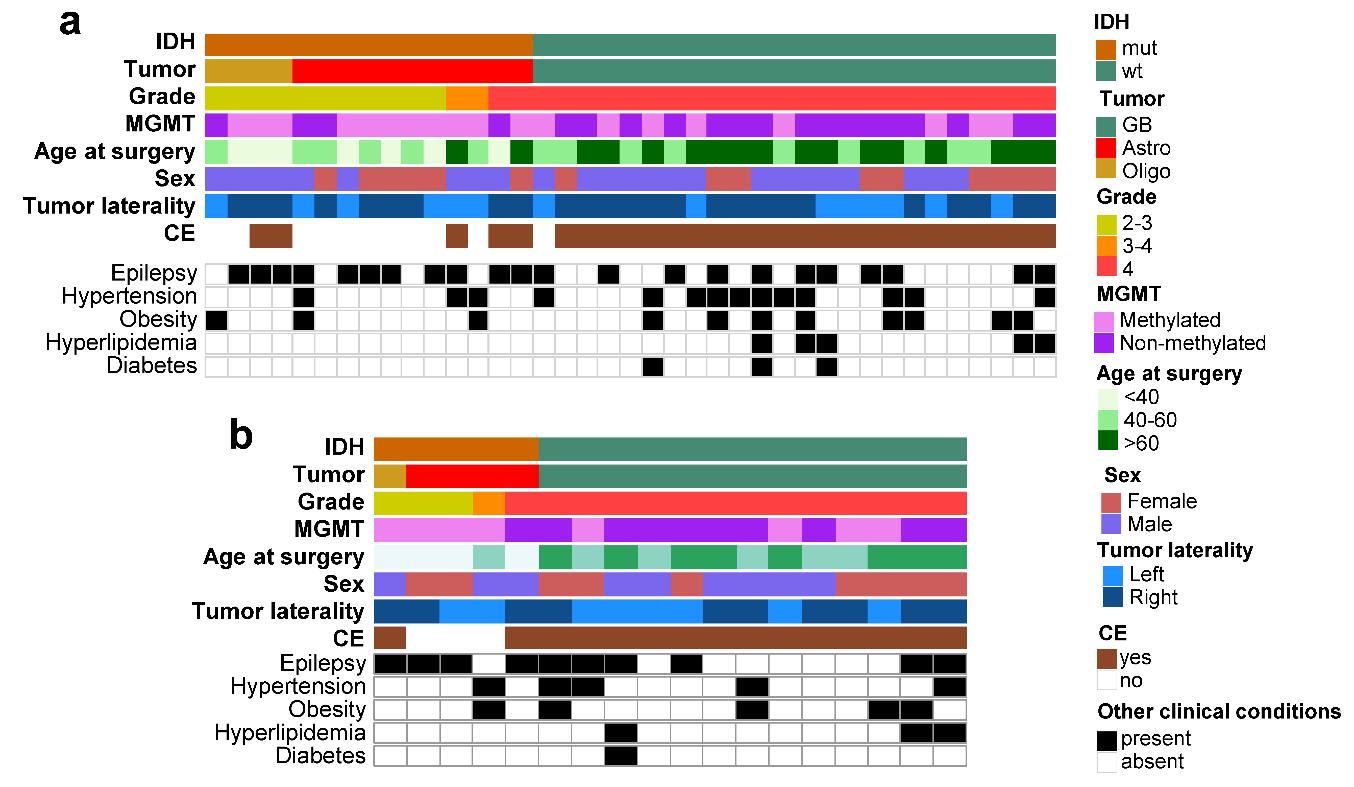


**Figure S1** – Summary of the incidence of other clinical conditions in the study cohort across (a) metabolomics and (b) drug response datasets.


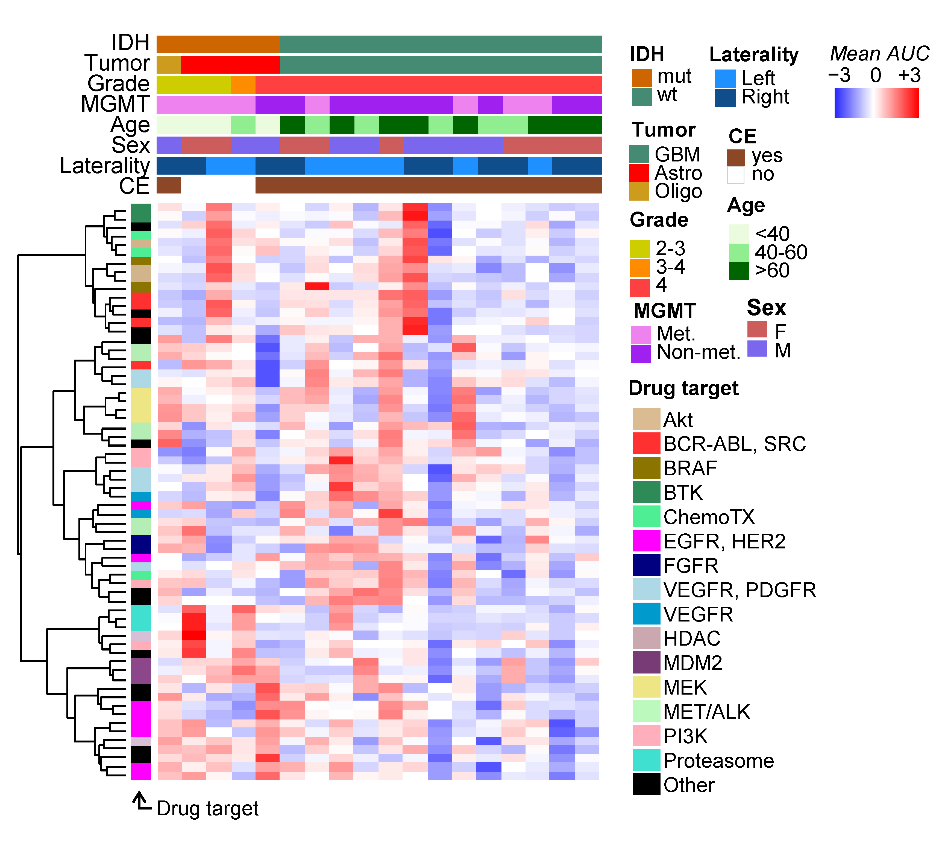


**Figure S2** – Heatmap showing average AUC values according to tumor PDC’s characteristics. The dendrogram represents the hierarchical relationship between the patterns of drug response, based on the calculation of Euclidean distances and Ward’s clustering method.


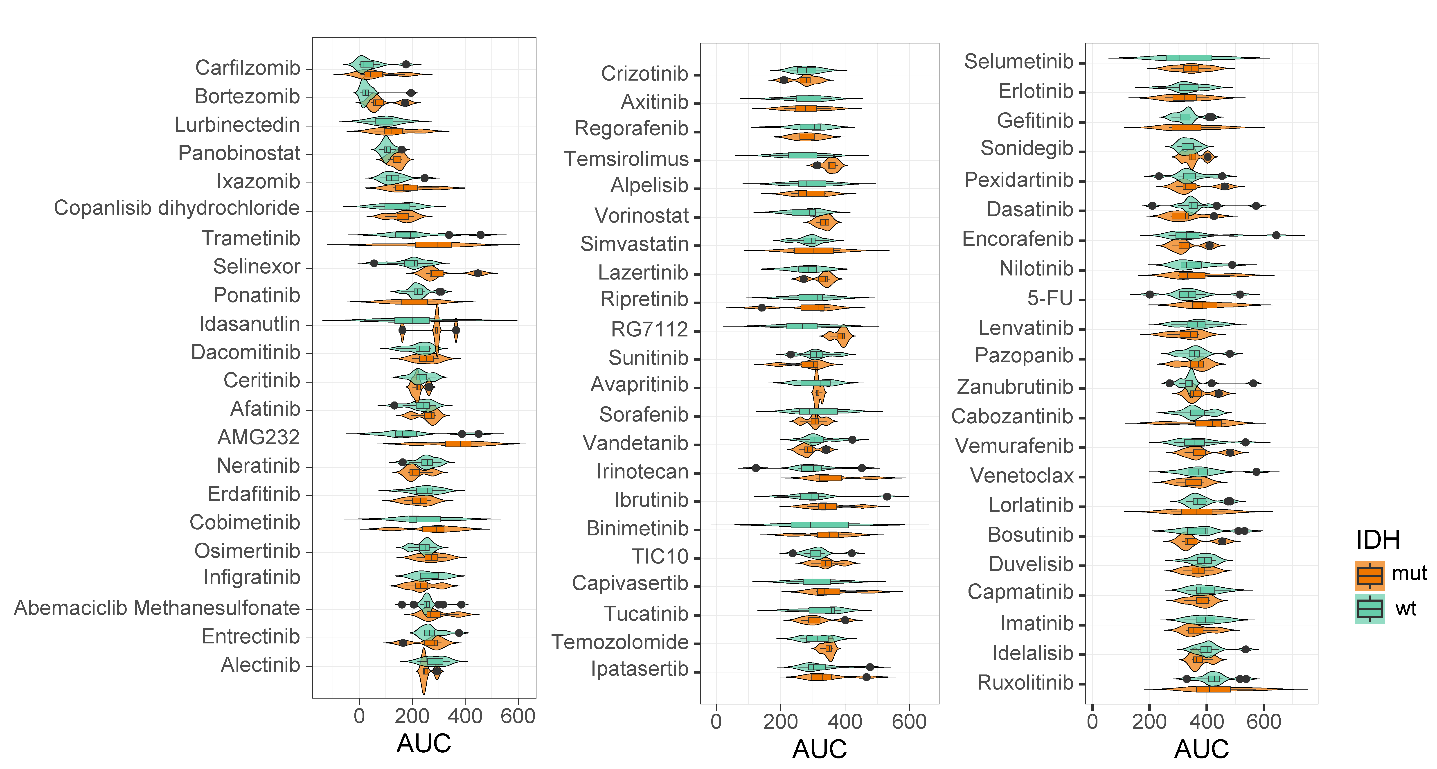


**Figure S3** – AUC values obtained for different drugs tested against PDCs from IDH mut or IDH wt tumors.

**Table S1** - Patient and tumor characteristics at baseline

|  | **Total** (n=39) | **IDH mut** (n= 15) | **IDH wt** (n= 24) |
| --- | --- | --- | --- |
| **Age** | | | |
| Median (range) - years |  | 43.6 (25-70) | 63.0 (43-83) |
| Distribution (% n) | 18-39 years | 7 (46.7) | − |
| 40-64 years | 7 (46.7) | 14 (58.3) |
| > 65 years | 1 (6.7) | 10 (41.7) |
| **Sex** (% n) | | | |
| Male |  | 9 (60.0) | 15 (62.5) |
| **Location of tumor at initial diagnosis** (% n) | | |  |
| Right |  | 9 (60.0) | 16 (67.0) |
| **Primary diagnosis versus recurrent disease** (% n) | | | |
| Primary |  | 6 (40.0) | 20 (83.3) |
| Recurrent |  | 9 (60.0) | 4 (16.7) |
| **Histological subtype** (% n) | |  |  |
| Oligodendroglioma |  | 4 (26.7) | − |
| Astrocytoma |  | 11 (73.3) | − |
| Glioblastoma |  | − | 24 (100) |
| **Glioma grade (CNS WHO 2021)** (% n) | | | |
| Grade 2 |  | 7 (46.7) | − |
| Grade 3 |  | 5 (33.3) | − |
| Grade 4 |  | 3 (20.0) | 24 (100) |
| **Contrast enhancement** (% n) | | | |
| Total |  | 5 (33.3) | 23 (96) |
| Glioma grade 2 |  | 1 (6.7) | − |
| Glioma grade 3 |  | 1 (6.7) | − |
| Glioma grade 4 |  | 3 (20.0) | 23 (96.0) |
| **MGMT methylation status** | |  |  |
| Methylated |  | 11 (73.3) | 8 (33.3) |
| Non-methylated |  | 4 (26.7) | 16 (67.0) |
| **Chemotherapy** (% n) | | | |
| Not available |  | 1 (6.7) | 1 (4.2) |
| Temozolomide |  | 2 (13.3) | 18 (75.0) |
| CeTeG |  | 0 | 5 (20.8) |
| **Comorbidities** (% n) | | | |
| Diabetes |  | 0 | 3 (12.5) |
| Hyperlipidemia |  | 0 | 5 (20.8) |
| Obesity |  | 3 (20.0) | 8 (33.3) |
| Hypertension |  | 3 (20.0) | 11 (45.8) |
| Epilepsy |  | 11 (73.3) | 11 (45.8) |
| **NGS Neuro Panel V4 most frequently mutated genes** (% n) | | | |
| EGFR amplification |  | 0 | 10 (41.7) |
| EGFR mutation |  | 0 | 7 (29.2) |
| TP53 |  | 10 (66.7) | 4 (16.7) |
| +7/-10 |  | 0 | 17 (70.8) |
| 1p19q co-deletion |  | 4 (26.7) | 0 |
| LZTR1 |  | 0 | 1 (4.2) |
| PTCH2 |  | 1 (6.7) | 2 (8.3) |
| PTEN |  | 0 | 2 (8.3) |
| TSC2 |  | 1 (6.7) | 2 (8.3) |

**Table S2** – List of drugs tested against PDC's, as well as their respective abbreviations and molecular targets

| **Drug** | **Target group** | **Used abbreviation** |
| --- | --- | --- |
| 5-FU | ChemoTX | 5-F |
| Abemaciclib Methanesulfonate | CDK4/6 | Abe |
| Afatinib | EGFR, HER2 | Afa |
| Alectinib | MET/ALK | Ale |
| Alpelisib | PI3K | Alp |
| AMG232 | MDM2 | AMG |
| Avapritinib | VEGFR, PDGFR | Ava |
| Axitinib | VEGFR, PDGFR | Axi |
| Binimetinib | MEK | Bin |
| Bortezomib | Proteasome | Bor |
| Bosutinib | BCR-ABL, SRC | Bos |
| Cabozantinib | MET/ALK, VEGFR | Cab |
| Capivasertib | Akt | Cap |
| Capmatinib | MET/ALK | Cpm |
| Carfilzomib | Proteasome | Car |
| Ceritinib | MET/ALK | Cer |
| Cobimetinib | MEK | Cob |
| Copanlisib dihydrochloride | PI3K | Cop |
| Crizotinib | MET/ALK | Cri |
| Dacomitinib | EGFR, HER2 | Dac |
| Dasatinib | BCR-ABL, SRC | Das |
| Duvelisib | PI3K | Duv |
| Encorafenib | BRAF | Enc |
| Entrectinib | MET/ALK, Trk | Ent |
| Erdafitinib | FGFR | Erd |
| Erlotinib | EGFR, HER2 | Erl |
| Gefitinib | EGFR, HER2 | Gef |
| Ibrutinib | BTK | Ibr |
| Idasanutlin | MDM2 | Ida |
| Idelalisib | PI3K | Ide |
| Imatinib | PDGFR, c-Kit, Bcr-Abl | Ima |
| Infigratinib | FGFR | Inf |
| Ipatasertib | Akt | Ipa |
| Irinotecan | ChemoTX | Iri |
| Ixazomib | Proteasome | Ixa |
| Lazertinib | EGFR, HER2 | Laz |
| Lenvatinib | VEGFR | Len |
| Lorlatinib | MET/ALK | Lor |
| Lurbinectedin | Transcription | Lur |
| Neratinib | EGFR, HER2 | Ner |
| Nilotinib | BCR-ABL, SRC | Nil |
| Osimertinib | EGFR, HER2 | Osi |
| Panobinostat | HDAC | Pan |
| Pazopanib | VEGFR, PDGFR | Paz |
| Pexidartinib | CSF1R | Pex |
| Ponatinib | BCR-ABL, SRC | Pon |
| Regorafenib | VEGFR, PDGFR, c-RET, Raf | Reg |
| RG7112 | MDM2 | RG7 |
| Ripretinib | VEGFR, PDGFR | Rip |
| Ruxolitinib | JAK | Rux |
| Selinexor | Exportin-1 | Sel |
| Selumetinib | MEK | Slu |
| Simvastatin | HMG-CoA reductase | Sim |
| Sonidegib | HH/Smth | Son |
| Sorafenib | PDGFR, Raf | Sor |
| Sunitinib | VEGFR, PDGFR, c-Kit | Sun |
| Temozolomide | ChemoTX | Tmz |
| Temsirolimus | mTOR | Tem |
| TIC10 | Akt | TIC |
| Trametinib | MEK | Tra |
| Tucatinib | EGFR, HER2 | Tuc |
| Vandetanib | VEGFR | Van |
| Vemurafenib | BRAF | Vem |
| Venetoclax | Bcl-2 | Ven |
| Vorinostat | HDAC | Vor |
| Zanubrutinib | BTK | Zan |

**Table S3** - Detected metabolites and respective p-values and fold-changes calculated for IDH mut *versus* IDH wt.

| **Metabolite** | **Metabolite class** | *p* | *p adj.* (Benjamini-Hochberg) | Fold-change |
| --- | --- | --- | --- | --- |
| **(IDH mut *versus* IDH wt)** | **(IDH mut *versus* IDH wt)** | **(IDH wt-IDH mut)/IDH mut** |
| 2-Hydroxyglutaric acid | Others | 1.2E-03 | 2.3E-02 | -1.9E-01 |
| 1,5-Anhydrosorbitol | Carbohydrates and conjugates | 5.9E-03 | 4.9E-02 | 1.4E-01 |
| Guanine | Nucleotides and metabolites | 2.8E-01 | 5.3E-01 | 4.6E-02 |
| Guanosine | Nucleotides and metabolites | 6.2E-01 | 8.3E-01 | 6.4E-03 |
| Guanosine monophosphate | Nucleotides and metabolites | 5.5E-01 | 7.9E-01 | -1.4E-02 |
| Hexose | Carbohydrates and conjugates | 1.5E-03 | 1.2E-02 | -4.3E-02 |
| Hexose di-phosphate | Carbohydrates and conjugates | 2.6E-01 | 4.8E-01 | -2.6E-02 |
| 4-Guanidinobutanoic acid | Amino acids, peptides and metabolites | 3.8E-01 | 6.2E-01 | -4.0E-02 |
| Hexose mono-phosphate | Carbohydrates and conjugates | 3.3E-01 | 5.5E-01 | 2.6E-02 |
| Histamine | Amino acids, peptides and metabolites | 4.6E-01 | 6.9E-01 | 3.9E-02 |
| Histidine | Amino acids, peptides and metabolites | 7.0E-01 | 8.8E-01 | -3.6E-03 |
| Hydroxybutyric acid, α-Hydroxyisobutyric acid | Energy metabolism | 3.5E-02 | 1.5E-01 | 4.1E-02 |
| Hypoxanthine | Nucleotides and metabolites | 1.8E-02 | 8.1E-02 | 2.5E-02 |
| Indoxyl sulphate | Amino acids, peptides and metabolites | 2.8E-05 | 5.1E-04 | 2.4E-01 |
| Inosine | Nucleotides and metabolites | 4.6E-01 | 6.9E-01 | 9.0E-03 |
| 6-Phosphogluconic acid | Carbohydrates and conjugates | 7.6E-02 | 2.3E-01 | 4.4E-02 |
| IMP | Nucleotides and metabolites | 3.3E-01 | 5.5E-01 | 1.6E-02 |
| Kynurenine | Amino acids, peptides and metabolites | 5.8E-02 | 1.8E-01 | 7.7E-02 |
| Lactic acid | Energy metabolism | 2.7E-01 | 5.3E-01 | 2.0E-02 |
| L-Cystathionine | Amino acids, peptides and metabolites | 3.5E-01 | 5.9E-01 | 1.6E-02 |
| Leucine, Isoleucine | Amino acids, peptides and metabolites | 2.6E-01 | 4.8E-01 | -1.0E-02 |
| Lysine | Amino acids, peptides and metabolites | 9.6E-01 | 9.7E-01 | -6.5E-04 |
| Malic acid | Energy metabolism | 9.1E-05 | 1.3E-03 | 4.3E-02 |
| Mannitol, Sorbitol | Carbohydrates and conjugates | 1.6E-02 | 8.7E-02 | 1.2E-01 |
| Methionine | Amino acids, peptides and metabolites | 5.1E-01 | 7.4E-01 | -6.6E-03 |
| NAD | Energy metabolism | 6.0E-02 | 1.6E-01 | 3.5E-02 |
| NADH | Energy metabolism | 7.7E-01 | 8.5E-01 | -1.2E-02 |
| NADP | Energy metabolism | 2.1E-02 | 8.4E-02 | -4.8E-02 |
| NADPH | Energy metabolism | 4.4E-01 | 6.8E-01 | 2.3E-02 |
| Niacinamide | Vitamins, Coenzymes, Cofactors | 4.3E-01 | 6.7E-01 | 9.4E-03 |
| Nicotinic acid | Vitamins, Coenzymes, Cofactors | 7.0E-02 | 1.8E-01 | -2.9E-02 |
| Ornithine | Amino acids, peptides and metabolites | 8.5E-04 | 7.2E-03 | 5.8E-02 |
| Orotic acid | Nucleotides and metabolites | 5.8E-04 | 1.8E-02 | 6.2E-02 |
| Oxalic acid | Others | 1.6E-01 | 3.4E-01 | 1.7E-02 |
| Oxidized-glutathione | Energy metabolism | 3.4E-02 | 1.2E-01 | 2.8E-02 |
| Oxoglutaric acid (α-KG) | Energy metabolism | 4.1E-03 | 2.7E-02 | 4.2E-02 |
| Palmitoylcarnitine | Vitamins, Coenzymes, Cofactors | 1.4E-01 | 3.1E-01 | 7.1E-02 |
| Pantothenic acid | Vitamins, Coenzymes, Cofactors | 2.7E-01 | 5.3E-01 | -1.4E-02 |
| p-Cresyl sulphate | Others | 5.4E-05 | 8.8E-04 | 2.2E-01 |
| Pentose | Carbohydrates and conjugates | 5.5E-02 | 1.5E-01 | -1.8E-02 |
| Phenylalanine | Amino acids, peptides and metabolites | 9.1E-01 | 9.6E-01 | -9.3E-04 |
| Phosphocholine | Lipids, steroids, bile acids and metabolites | 3.7E-06 | 9.8E-05 | 8.9E-02 |
| Phosphocreatine | Energy metabolism | 1.9E-01 | 3.8E-01 | -4.0E-02 |
| Phosphoenolpyruvic acid | Energy metabolism | 1.2E-01 | 2.9E-01 | -5.3E-02 |
| Acetylglycine | Amino acids, peptides and metabolites | 8.7E-01 | 9.5E-01 | -2.0E-03 |
| Phosphoserine | Amino acids, peptides and metabolites | 6.5E-03 | 4.9E-02 | 8.2E-02 |
| Proline | Amino acids, peptides and metabolites | 3.0E-02 | 1.2E-01 | 5.7E-02 |
| Pyridoxine | Vitamins, Coenzymes, Cofactors | 6.9E-01 | 8.8E-01 | -2.4E-02 |
| Pyroglutamic acid | Amino acids, peptides and metabolites | 5.6E-03 | 3.6E-02 | 3.3E-02 |
| Riboflavin | Vitamins, Coenzymes, Cofactors | 9.7E-01 | 9.7E-01 | -4.0E-04 |
| Serine | Amino acids, peptides and metabolites | 3.5E-05 | 6.5E-04 | 5.2E-02 |
| Succinic acid | Energy metabolism | 1.4E-06 | 5.1E-05 | 7.7E-02 |
| Adenine | Nucleotides and metabolites | 5.6E-01 | 7.9E-01 | 9.7E-03 |
| Taurine | Amino acids, peptides and metabolites | 5.8E-01 | 8.0E-01 | 7.5E-03 |
| Thiamine | Vitamins, Coenzymes, Cofactors | 8.9E-01 | 9.5E-01 | 2.6E-03 |
| Adenosine | Nucleotides and metabolites | 3.7E-01 | 6.0E-01 | 2.4E-02 |
| Thymine | Nucleotides and metabolites | 6.8E-03 | 3.7E-02 | 3.7E-02 |
| Trehalose | Carbohydrates and conjugates | 5.6E-01 | 7.6E-01 | -1.2E-03 |
| TMAO | Others | 6.2E-01 | 8.1E-01 | -8.8E-03 |
| Tryptophan | Amino acids, peptides and metabolites | 7.0E-01 | 8.8E-01 | 3.4E-03 |
| Tyrosine | Amino acids, peptides and metabolites | 7.6E-01 | 8.8E-01 | 3.0E-03 |
| UDP | Nucleotides and metabolites | 7.1E-01 | 8.8E-01 | 8.6E-03 |
| Uracil | Nucleotides and metabolites | 8.7E-08 | 8.0E-06 | 2.1E-01 |
| Uric acid | Nucleotides and metabolites | 5.7E-05 | 8.8E-04 | 1.1E-01 |
| Adenosylhomocysteine | Carbohydrates and conjugates | 4.2E-01 | 6.4E-01 | 1.3E-02 |
| Uridine | Nucleotides and metabolites | 9.7E-01 | 9.7E-01 | -4.7E-04 |
| UMP | Nucleotides and metabolites | 4.3E-02 | 1.4E-01 | 4.0E-02 |
| UTP | Nucleotides and metabolites | 1.8E-01 | 4.0E-01 | 7.3E-02 |
| FFA C5:0 (Valeric acid) | Fatty acids and metabolites | 8.5E-01 | 8.7E-01 | 6.7E-04 |
| Valine | Amino acids, peptides and metabolites | 1.8E-01 | 3.6E-01 | 2.1E-02 |
| Vitamin A | Vitamins, Coenzymes, Cofactors | 6.2E-01 | 8.3E-01 | -1.3E-02 |
| Xanthine | Nucleotides and metabolites | 1.6E-01 | 3.4E-01 | 2.0E-02 |
| PC 30:0 | Lipids, steroids, bile acids and metabolites | 8.1E-01 | 9.2E-01 | 6.8E-03 |
| PC 32:1 | Lipids, steroids, bile acids and metabolites | 7.2E-01 | 8.5E-01 | 7.9E-03 |
| PC 32:2 | Lipids, steroids, bile acids and metabolites | 7.3E-01 | 8.8E-01 | 8.3E-03 |
| PC 34:1 | Lipids, steroids, bile acids and metabolites | 7.3E-01 | 8.8E-01 | 6.0E-03 |
| PC 34:3 | Lipids, steroids, bile acids and metabolites | 5.2E-02 | 1.5E-01 | 3.8E-02 |
| PC 36:2 | Lipids, steroids, bile acids and metabolites | 9.6E-01 | 9.7E-01 | 7.0E-04 |
| PC 36:3 | Lipids, steroids, bile acids and metabolites | 4.9E-03 | 2.9E-02 | 5.0E-02 |
| PC 36:4 | Lipids, steroids, bile acids and metabolites | 3.2E-01 | 5.5E-01 | 1.9E-02 |
| PC 36:5 | Lipids, steroids, bile acids and metabolites | 8.3E-01 | 9.3E-01 | 3.9E-03 |
| ADMA | Amino acids, peptides and metabolites | 6.2E-03 | 3.7E-02 | 4.7E-02 |
| PC 38:3 | Lipids, steroids, bile acids and metabolites | 5.4E-01 | 7.6E-01 | 6.0E-03 |
| PC 38:4 | Lipids, steroids, bile acids and metabolites | 6.3E-01 | 8.4E-01 | 8.8E-03 |
| PC 38:5 | Lipids, steroids, bile acids and metabolites | 9.5E-01 | 9.7E-01 | -1.0E-03 |
| PC 38:6 | Lipids, steroids, bile acids and metabolites | 3.3E-01 | 5.5E-01 | 1.9E-02 |
| PC 38:7 | Lipids, steroids, bile acids and metabolites | 9.1E-01 | 9.6E-01 | -2.1E-03 |
| PC 40:5 | Lipids, steroids, bile acids and metabolites | 8.1E-01 | 8.5E-01 | -1.3E-02 |
| PC 40:6 | Lipids, steroids, bile acids and metabolites | 8.9E-01 | 9.5E-01 | -2.8E-03 |
| PC 40:7 | Lipids, steroids, bile acids and metabolites | 7.1E-01 | 8.6E-01 | 5.5E-03 |
| PC 40:8 | Lipids, steroids, bile acids and metabolites | 1.6E-01 | 3.6E-01 | 1.6E-02 |
| ADP | Nucleotides and metabolites | 2.1E-01 | 4.2E-01 | -2.1E-02 |
| PE 36:2 | Lipids, steroids, bile acids and metabolites | 1.4E-01 | 3.1E-01 | 3.5E-02 |
| PE 36:4 | Lipids, steroids, bile acids and metabolites | 4.0E-01 | 6.2E-01 | 2.8E-02 |
| PE 38:2 | Lipids, steroids, bile acids and metabolites | 7.9E-01 | 8.5E-01 | 1.9E-02 |
| LysoPE(16:0) | Lipids, steroids, bile acids and metabolites | 5.8E-01 | 8.0E-01 | -6.6E-03 |
| LysoPE(18:0) | Lipids, steroids, bile acids and metabolites | 5.3E-01 | 7.6E-01 | -1.1E-02 |
| LysoPE(18:1) | Lipids, steroids, bile acids and metabolites | 5.6E-01 | 7.9E-01 | -1.1E-02 |
| LysoPE(18:2) | Lipids, steroids, bile acids and metabolites | 4.5E-02 | 1.4E-01 | 5.0E-02 |
| LysoPE(20:4) | Lipids, steroids, bile acids and metabolites | 8.0E-03 | 4.4E-02 | 3.7E-02 |
| LysoPE(22:5) | Lipids, steroids, bile acids and metabolites | 3.9E-02 | 1.3E-01 | 3.1E-02 |
| LysoPE(22:6) | Lipids, steroids, bile acids and metabolites | 7.9E-02 | 2.1E-01 | 3.7E-02 |
| LysoPC(16:0) | Lipids, steroids, bile acids and metabolites | 5.3E-01 | 7.6E-01 | 7.3E-03 |
| LysoPC(16:1) | Lipids, steroids, bile acids and metabolites | 2.7E-01 | 4.8E-01 | -1.7E-02 |
| LysoPC(18:1) | Lipids, steroids, bile acids and metabolites | 4.6E-01 | 6.9E-01 | -1.1E-02 |
| LysoPC(18:2) | Lipids, steroids, bile acids and metabolites | 2.3E-04 | 1.4E-02 | 8.3E-02 |
| LysoPC(18:3) | Lipids, steroids, bile acids and metabolites | 6.8E-01 | 8.7E-01 | 5.1E-03 |
| LysoPC(20:2) | Lipids, steroids, bile acids and metabolites | 7.0E-01 | 8.4E-01 | -1.1E-02 |
| LysoPC(20:3) | Lipids, steroids, bile acids and metabolites | 8.1E-02 | 2.3E-01 | 3.1E-02 |
| LysoPC(20:4) | Lipids, steroids, bile acids and metabolites | 5.6E-01 | 7.6E-01 | 1.4E-02 |
| LysoPC(22:5) | Lipids, steroids, bile acids and metabolites | 2.0E-01 | 4.3E-01 | 3.0E-02 |
| LysoPC(22:6) | Lipids, steroids, bile acids and metabolites | 1.1E-01 | 2.7E-01 | 2.8E-02 |
| SM 34:1 | Lipids, steroids, bile acids and metabolites | 1.4E-01 | 3.1E-01 | 6.0E-02 |
| SM 34:2 | Lipids, steroids, bile acids and metabolites | 2.4E-04 | 2.8E-03 | 1.2E-01 |
| SM 36:2 | Lipids, steroids, bile acids and metabolites | 3.4E-02 | 1.2E-01 | 8.3E-02 |
| Allantoin | Nucleotides and metabolites | 4.9E-07 | 3.0E-05 | 1.8E-01 |
| PS 38:0 | Lipids, steroids, bile acids and metabolites | 7.4E-01 | 8.8E-01 | -3.8E-03 |
| PS 38:1 | Lipids, steroids, bile acids and metabolites | 1.4E-01 | 3.1E-01 | 1.7E-02 |
| PS 40:2 | Lipids, steroids, bile acids and metabolites | 2.5E-03 | 1.6E-02 | 4.3E-02 |
| PS 40:3 | Lipids, steroids, bile acids and metabolites | 4.8E-01 | 7.1E-01 | 8.9E-03 |
| α-Aminobutyric acid | Amino acids, peptides and metabolites | 7.0E-01 | 8.8E-01 | -1.4E-02 |
| PI 36:1 | Lipids, steroids, bile acids and metabolites | 9.6E-01 | 9.7E-01 | 1.5E-03 |
| PI 38:2 | Lipids, steroids, bile acids and metabolites | 1.0E-02 | 6.2E-02 | 4.3E-02 |
| PI 38:4 | Lipids, steroids, bile acids and metabolites | 4.5E-01 | 6.7E-01 | -2.7E-02 |
| 1-Methylhistidine | Amino acids, peptides and metabolites | 3.3E-01 | 5.5E-01 | 2.0E-02 |
| PI 38:5 | Lipids, steroids, bile acids and metabolites | 1.9E-05 | 3.9E-04 | -1.2E-01 |
| FFA C12:0 (Lauric acid) | Fatty acids and metabolites | 2.4E-01 | 4.5E-01 | 1.5E-02 |
| FFA C14:0 (Myristic acid) | Fatty acids and metabolites | 8.8E-01 | 9.5E-01 | -1.9E-03 |
| FFA C15:0 (Pentadecylic acid) | Fatty acids and metabolites | 2.2E-01 | 4.2E-01 | 1.7E-02 |
| FFA C16:0 (Palmitic acid) | Fatty acids and metabolites | 6.8E-01 | 8.3E-01 | -7.0E-03 |
| FFA C17:0 (Margaric acid) | Fatty acids and metabolites | 3.6E-01 | 5.9E-01 | 1.5E-02 |
| FFA C18:0 (Stearic acid) | Fatty acids and metabolites | 4.2E-01 | 6.4E-01 | -1.4E-02 |
| FFA C19:0 (Nonadecylic acid) | Fatty acids and metabolites | 7.4E-01 | 8.8E-01 | -9.2E-03 |
| FFA C20:0 (Arachidic acid) | Fatty acids and metabolites | 2.9E-01 | 5.2E-01 | 3.5E-02 |
| Alpha-Tocopherol | Vitamins, Coenzymes, Cofactors | 4.5E-02 | 1.4E-01 | 6.7E-02 |
| FFA C12:1 (Lauroleic acid) | Fatty acids and metabolites | 8.6E-02 | 2.1E-01 | 3.3E-02 |
| FFA C14:1 (Myristoleic acid) | Fatty acids and metabolites | 1.3E-01 | 3.1E-01 | 2.9E-02 |
| FFA C15:1 (Pentadecenoic acid) | Fatty acids and metabolites | 8.1E-01 | 9.2E-01 | -3.4E-03 |
| FFA C16:1 (Palmitoleic acid) | Fatty acids and metabolites | 4.5E-01 | 6.9E-01 | -9.7E-03 |
| FFA C17:1 (Heptadecenoic acid) | Fatty acids and metabolites | 8.5E-01 | 9.4E-01 | 3.3E-03 |
| FFA C18:1 (Oleic acid) | Fatty acids and metabolites | 1.2E-01 | 2.9E-01 | -1.5E-02 |
| FFA C19:1 (Nonadecenoic acid) | Fatty acids and metabolites | 7.7E-01 | 8.5E-01 | -1.5E-02 |
| FFA C20:1 (Eicosenoic acid) | Fatty acids and metabolites | 1.3E-01 | 3.1E-01 | -2.3E-02 |
| FFA C12:2 (Dodecadienoic acid) | Fatty acids and metabolites | 8.5E-01 | 9.4E-01 | 2.4E-03 |
| FFA C14:2 (Tetradecadienoic acid) | Fatty acids and metabolites | 7.4E-04 | 6.6E-03 | 9.2E-02 |
| FFA C16:2 (Palmitolinoleic acid) | Fatty acids and metabolites | 7.2E-02 | 1.8E-01 | -3.3E-02 |
| FFA C18:2 (Linoleic Acid, LA) | Fatty acids and metabolites | 6.0E-03 | 3.4E-02 | 5.0E-02 |
| FFA C20:2 (Eicosadienoic acid) | Fatty acids and metabolites | 4.0E-02 | 1.3E-01 | -3.0E-02 |
| FFA C16:3 (Hiragonic acid) | Fatty acids and metabolites | 2.2E-02 | 8.7E-02 | 5.0E-02 |
| FFA C18:3 (a-Linolenic acid, ALA, or g-linolenic acid, GLA) | Fatty acids and metabolites | 1.8E-01 | 3.6E-01 | 2.6E-02 |
| FFA C20:3 (Dihomo-g-linolenic acid, DGLA) | Fatty acids and metabolites | 3.0E-01 | 5.2E-01 | 1.6E-02 |
| FFA C18:4 (Stearidonic acid) | Fatty acids and metabolites | 1.7E-02 | 8.7E-02 | 6.7E-02 |
| FFA C20:4 (Arachidonic acid, ARA) | Fatty acids and metabolites | 8.5E-01 | 8.7E-01 | -4.6E-03 |
| FFA C22:6 (Docosahexaenoic acid, DHA) | Fatty acids and metabolites | 4.8E-01 | 7.1E-01 | 9.2E-03 |
| Anserine | Amino acids, peptides and metabolites | 4.1E-02 | 1.6E-01 | -7.2E-02 |
| Alanine | Amino acids, peptides and metabolites | 4.6E-02 | 1.4E-01 | 2.5E-02 |
| FFA C3:0 (Propionic acid) | Fatty acids and metabolites | 1.9E-06 | 6.0E-05 | 8.3E-02 |
| FFA C4:0 (Butyric acid) | Fatty acids and metabolites | 2.0E-02 | 8.3E-02 | -2.6E-02 |
| FFA C6:0 (Caproic acid) | Fatty acids and metabolites | 3.2E-01 | 5.7E-01 | -1.3E-02 |
| FFA C7:0 (Heptylic acid) | Fatty acids and metabolites | 2.8E-01 | 5.3E-01 | -8.0E-03 |
| FFA C9:0 (Pelargonic acid) | Fatty acids and metabolites | 2.9E-01 | 5.2E-01 | -1.3E-02 |
| FFA C10:0 (Capric acid) | Fatty acids and metabolites | 1.4E-01 | 3.1E-01 | 3.4E-02 |
| FFA C11:0 (Undecylic acid) | Fatty acids and metabolites | 5.9E-01 | 8.1E-01 | -1.1E-02 |
| FFA C13:0 (Tridecanoic acid) | Fatty acids and metabolites | 8.1E-01 | 8.5E-01 | -3.5E-04 |
| FFA C20:6 (Eicosatriynoic acid) | Fatty acids and metabolites | 2.5E-01 | 4.7E-01 | 6.3E-02 |
| FFA C21:1 (Heneicosenoic acid) | Fatty acids and metabolites | 7.5E-01 | 8.8E-01 | 7.4E-03 |
| FFA C22:1 (Erucic acid) | Fatty acids and metabolites | 9.2E-01 | 9.6E-01 | 4.3E-03 |
| FFA C22:2 (Docosadienoic acid) | Fatty acids and metabolites | 8.2E-02 | 2.0E-01 | -5.2E-02 |
| FFA C22:3 (Docosatrienoic acid, DTrE) | Fatty acids and metabolites | 2.8E-04 | 3.0E-03 | -6.9E-02 |
| FFA C22:4 (Adrenic Acid) | Fatty acids and metabolites | 7.8E-03 | 5.2E-02 | -3.7E-02 |
| FFA C22:5 (Docosapentaenoic acid, DPA) | Fatty acids and metabolites | 9.6E-01 | 9.7E-01 | -4.8E-04 |
| Arginine | Amino acids, peptides and metabolites | 6.6E-01 | 8.2E-01 | -1.0E-02 |
| FFA C24:1 (Nervonic acid) | Fatty acids and metabolites | 7.2E-01 | 8.8E-01 | -1.0E-02 |
| FFA C24:2 (Tetracosadienoic acid) | Fatty acids and metabolites | 7.4E-01 | 8.5E-01 | -4.9E-03 |
| FFA C24:3 (Tetracosatrienoic acid) | Fatty acids and metabolites | 1.5E-04 | 2.0E-03 | -1.2E-01 |
| Asparagine | Amino acids, peptides and metabolites | 6.3E-08 | 1.2E-05 | 1.5E-01 |
| LysoPC(17:0) | Lipids, steroids, bile acids and metabolites | 1.9E-02 | 8.3E-02 | 5.6E-02 |
| LysoPC(17:1) | Lipids, steroids, bile acids and metabolites | 6.6E-01 | 8.6E-01 | 1.2E-02 |
| LysoPC(19:1) | Lipids, steroids, bile acids and metabolites | 8.2E-01 | 9.3E-01 | -9.1E-03 |
| Aspartic acid | Amino acids, peptides and metabolites | 5.2E-02 | 1.5E-01 | 4.5E-02 |
| LysoPC(18:0) | Lipids, steroids, bile acids and metabolites | 5.2E-02 | 1.5E-01 | 4.2E-02 |
| LysoPE(15:0) | Lipids, steroids, bile acids and metabolites | 6.4E-02 | 1.7E-01 | 2.4E-02 |
| LysoPE(15:1) | Lipids, steroids, bile acids and metabolites | 6.9E-01 | 8.8E-01 | -9.7E-03 |
| LysoPE(17:0) | Lipids, steroids, bile acids and metabolites | 7.2E-01 | 8.7E-01 | -6.5E-03 |
| LysoPE(17:1) | Lipids, steroids, bile acids and metabolites | 6.2E-01 | 8.3E-01 | 2.0E-02 |
| LysoPE(19:0) | Lipids, steroids, bile acids and metabolites | 7.4E-01 | 8.8E-01 | -5.5E-03 |
| LysoPE(19:1) | Lipids, steroids, bile acids and metabolites | 9.7E-01 | 9.7E-01 | 5.6E-04 |
| LysoPE(21:0) | Lipids, steroids, bile acids and metabolites | 4.2E-01 | 6.5E-01 | 2.6E-02 |
| ATP | Nucleotides and metabolites | 9.0E-01 | 9.5E-01 | -4.2E-03 |
| LysoPE(21:1) | Lipids, steroids, bile acids and metabolites | 5.9E-02 | 1.6E-01 | -4.6E-02 |
| LysoPE(20:0) | Lipids, steroids, bile acids and metabolites | 5.1E-02 | 1.8E-01 | 7.6E-02 |
| FFA C31:0 (Hentriacontanoic acid) | Fatty acids and metabolites | 3.3E-03 | 2.3E-02 | -5.1E-02 |
| 2,3-Butanediol | Others | 6.4E-01 | 8.1E-01 | 9.1E-03 |
| FFA C13:1 (Tridecenoic acid) | Fatty acids and metabolites | 6.0E-01 | 8.2E-01 | -6.3E-03 |
| FFA C13:2 (Tridecadienoic acid) | Fatty acids and metabolites | 5.4E-02 | 1.8E-01 | -3.8E-02 |
| FFA C17:2 (Heptadedienoic acid) | Fatty acids and metabolites | 6.4E-01 | 8.1E-01 | -7.3E-03 |
| FFA C19:2 (Nonadecadienoic acid) | Fatty acids and metabolites | 1.7E-02 | 7.6E-02 | -5.0E-02 |
| FFA C21:2 (Heneicosadienoic acid) | Fatty acids and metabolites | 6.7E-02 | 1.7E-01 | -3.5E-02 |
| Bilirubin | Others | 1.2E-01 | 3.0E-01 | 8.7E-02 |
| LysoPC(14:0) | Lipids, steroids, bile acids and metabolites | 3.0E-01 | 5.4E-01 | 1.5E-02 |
| Glycerol 3-phosphate | Lipids, steroids, bile acids and metabolites | 6.8E-02 | 1.7E-01 | 3.5E-02 |
| GTP | Nucleotides and metabolites | 4.8E-01 | 7.1E-01 | -1.8E-02 |
| Glycine | Amino acids, peptides and metabolites | 1.1E-02 | 5.6E-02 | 6.2E-02 |
| cAMP | Nucleotides and metabolites | 3.3E-01 | 5.5E-01 | -4.0E-02 |
| FFA C8:0 (Caprylic acid) | Fatty acids and metabolites | 2.4E-03 | 2.8E-02 | 9.3E-02 |
| AMP | Nucleotides and metabolites | 8.8E-01 | 9.5E-01 | 3.5E-03 |
| GMP | Nucleotides and metabolites | 6.7E-01 | 8.7E-01 | -9.9E-03 |
| Carnitine | Vitamins, Coenzymes, Cofactors | 5.7E-08 | 8.0E-06 | 1.4E-01 |
| Carnosine | Amino acids, peptides and metabolites | 1.2E-01 | 2.9E-01 | 8.3E-02 |
| CDP | Nucleotides and metabolites | 8.7E-01 | 9.5E-01 | 4.9E-03 |
| Deoxyguanosine | Nucleotides and metabolites | 4.8E-03 | 4.8E-02 | 5.9E-02 |
| Deoxyinosine | Nucleotides and metabolites | 1.5E-03 | 2.3E-02 | 1.4E-01 |
| 2-Ketobutyric acid, Acetoacetic acid | Energy metabolism | 3.8E-04 | 3.8E-03 | 5.4E-02 |
| CDP-Choline | Nucleotides and metabolites | 2.0E-02 | 8.3E-02 | 4.7E-02 |
| Sarcosine | Amino acids, peptides and metabolites | 4.7E-02 | 1.4E-01 | 2.5E-02 |
| Deoxycholic acid, Chenodeoxycholic acid | Lipids, steroids, bile acids and metabolites | 2.2E-01 | 4.2E-01 | 2.7E-02 |
| Choline | Lipids, steroids, bile acids and metabolites | 4.6E-02 | 1.4E-01 | 1.5E-02 |
| Citric acid | Energy metabolism | 3.8E-01 | 6.1E-01 | 5.8E-03 |
| Citrulline | Amino acids, peptides and metabolites | 1.7E-01 | 3.6E-01 | 3.3E-02 |
| 2-Oxovaleric acid | Others | 1.3E-03 | 1.0E-02 | 7.6E-02 |
| Creatine | Amino acids, peptides and metabolites | 3.8E-01 | 6.1E-01 | -1.5E-02 |
| Creatinine | Amino acids, peptides and metabolites | 4.8E-02 | 1.4E-01 | -2.6E-02 |
| CTP | Nucleotides and metabolites | 3.5E-01 | 5.9E-01 | -3.5E-02 |
| Cytidine | Nucleotides and metabolites | 7.1E-01 | 8.8E-01 | 5.9E-03 |
| Cytidine monophosphate (CMP) | Nucleotides and metabolites | 2.9E-01 | 5.1E-01 | 2.0E-02 |
| Cytosine | Nucleotides and metabolites | 2.2E-01 | 4.2E-01 | 2.2E-02 |
| Threonine, Homoserine | Amino acids, peptides and metabolites | 3.7E-02 | 1.3E-01 | 2.3E-02 |
| dAMP | Nucleotides and metabolites | 1.3E-02 | 6.3E-02 | -7.2E-02 |
| Dehydrocholic acid | Lipids, steroids, bile acids and metabolites | 1.4E-01 | 3.1E-01 | 3.6E-02 |
| Deoxyuridine | Nucleotides and metabolites | 3.9E-02 | 1.3E-01 | 5.7E-02 |
| Dihydroxyacetone phosphate | Energy metabolism | 7.8E-01 | 8.9E-01 | -5.7E-03 |
| Dimethoxychalcone | Others | 1.9E-02 | 8.2E-02 | -4.0E-02 |
| Saccharose | Carbohydrates and conjugates | 9.2E-01 | 9.2E-01 | 5.8E-03 |
| Saccharin (-Natrium) | Others | 4.5E-06 | 1.0E-04 | 9.6E-02 |
| FFA C20:5 (Eicosapentanoic acid, EPA) | Fatty acids and metabolites | 1.8E-01 | 3.6E-01 | 2.4E-02 |
| Fumaric acid | Energy metabolism | 3.9E-04 | 3.8E-03 | 4.2E-02 |
| GDP | Nucleotides and metabolites | 1.6E-02 | 7.6E-02 | -3.9E-02 |
| Gluconic acid | Carbohydrates and conjugates | 7.9E-03 | 4.4E-02 | 4.3E-02 |
| Glucosamine 6-phosphate | Carbohydrates and conjugates | 4.4E-04 | 4.0E-03 | -3.1E-02 |
| Glucuronic acid | Carbohydrates and conjugates | 3.2E-02 | 1.2E-01 | 9.0E-02 |
| Glutamic acid | Amino acids, peptides and metabolites | 5.8E-02 | 1.8E-01 | 4.4E-02 |
| 3-Methyl-2-oxovaleric acid | Amino acids, peptides and metabolites | 2.4E-03 | 1.7E-02 | 8.8E-02 |
| Glutamine | Amino acids, peptides and metabolites | 2.0E-03 | 1.5E-02 | 3.6E-02 |
| Glycerol | Carbohydrates and conjugates | 1.8E-01 | 3.6E-01 | -1.4E-02 |
| Glycochenodeoxycholate | Lipids, steroids, bile acids and metabolites | 2.4E-02 | 1.1E-01 | 1.3E-01 |
